# Supplementary material
Source: bioRxiv or medRxiv preprint supplement (https://medrxiv.org/highwire/filestream/93925/field_highwire_adjunct_files/0/2020.08.19.20178319-1.pdf)
Supplement: Supplementary file [file 2020.08.19.20178319-1.pdf]

## **Evaluating aerosol and splatter during orthodontic debonding: implications for the COVID-19 pandemic**

Hayley Llandro<sup>1,2</sup>, James R Allison<sup>1,2</sup>, Charlotte C Currie<sup>1,2</sup>, David C Edwards<sup>1,2</sup>, Charlotte Bowes<sup>1,2</sup>, Justin Durham<sup>1,2</sup>, Nicholas Jakubovics<sup>2</sup>, Nadia Rostami<sup>2</sup>, Richard Holliday<sup>1,2</sup>

### **Affiliations**

1. Newcastle Upon Tyne Hospitals NHS Foundation Trust, Newcastle Upon Tyne, United Kingdom
2. School of Dental Sciences, Newcastle University, United Kingdom

**Corresponding Author:** Richard Holliday; School of Dental Sciences, Newcastle University, Newcastle upon Tyne, NE1 7RU; [richard.holliday@newcastle.ac.uk](mailto:richard.holliday@newcastle.ac.uk)

Supplementary Material

|                                 |     | Rig contamination. Distance from centre (m) |                     |                    |                    |                   |                    |                    |                          |                         |              |
|---------------------------------|-----|---------------------------------------------|---------------------|--------------------|--------------------|-------------------|--------------------|--------------------|--------------------------|-------------------------|--------------|
| Min                             |     | 0                                           | 0.5                 | 1                  | 1.5                | 2                 | 2.5                | 3                  | 3.5                      | 4                       | Total        |
| Mean (SD)                       |     |                                             |                     |                    |                    |                   |                    |                    |                          |                         |              |
| Max                             |     | 11.16                                       | 0.00                | 0.00               | 0.00               | 0.00              | 0.00               | 0.00               | 0.00                     | 0.00                    | 0.00         |
| Sum                             |     | <b>91.5</b>                                 | <b>1.88</b>         | <b>0.01</b>        | <b>0.00</b>        | <b>0.00</b>       | <b>0.00</b>        | <b>0.00</b>        | <b>0.00</b>              | <b>0.00</b>             | 1.64         |
| [n]                             |     | (127.8)                                     | (5.78)              | (0.05)             | (0.00)             | (0.00)            | (0.00)             | (0.00)             | (0.00)                   | (0.00)                  | (17.3)       |
| Surface area (mm <sup>2</sup> ) |     | 238.88                                      | 26.24               | 0.25               | 0.00               | 0.00              | 0.00               | 0.00               | 0.00                     | 0.01                    | 238.88       |
|                                 |     | 274.61                                      | 45.31               | 0.36               | 0.00               | 0.00              | 0.00               | 0.00               | 0.00                     | 0.01                    | 320.29       |
|                                 |     | [3]                                         | [24]                | [24]               | [24]               | [24]              | [24]               | [24]               | [24]                     | [24]                    | [195]        |
|                                 |     | 0                                           | 0                   | 0                  | 0                  | 0                 | 0                  | 0.00               | 0                        | 0                       | 0            |
|                                 |     | 2328                                        | <b>1019</b>         | <b>251</b>         | <b>31</b> (153)    | <b>0</b> (0)      | <b>9</b> (45)      | <b>59</b> (290)    | <b>0</b> (0)             | <b>31</b> (151)         | 208          |
| Fluorescence (RFU)              |     | (2917)                                      | (3335)              | (1230)             | 749                | 0                 | 220                | 1421               | 0                        | 738                     | (1334)       |
|                                 |     | 5601                                        | 13207               | 6028               | 749                | 0                 | 220                | 1421               | 0                        | 738                     | 13207        |
|                                 |     | 6984                                        | 24451               | 6028               | [24]               | [24]              | [24]               | [24]               | [24]                     | [24]                    | 40591        |
|                                 |     | [3]                                         | [24]                | [24]               |                    |                   |                    |                    |                          |                         | [195]        |
|                                 |     |                                             |                     |                    |                    |                   |                    |                    |                          |                         |              |
| Operator contamination          |     |                                             |                     |                    |                    |                   |                    |                    |                          |                         |              |
|                                 |     | <b>Left body</b>                            | <b>Right Body</b>   | <b>Left arm</b>    | <b>Right arm</b>   | <b>Left leg</b>   | <b>Right leg</b>   | <b>Head</b>        | <b>Visor<sup>#</sup></b> | <b>Mask<sup>§</sup></b> | <b>Total</b> |
| Surface area (mm <sup>2</sup> ) |     | 37.41                                       | 0.00                | 0.09               | 0.00               | 0.00              | 0.00               | 0.00               | 0.00                     | 0.00                    | 0.00         |
|                                 |     | <b>23.62</b>                                | <b>0.00</b>         | <b>12.76</b>       | <b>0.00</b>        | <b>0.01</b>       | <b>0.00</b>        | <b>0.00</b>        | <b>4.26</b>              | <b>0.00</b>             | 3.87         |
|                                 |     | (16.9)                                      | (0.00)              | (11.2)             | (0.00)             | (0.02)            | (0.00)             | (0.01)             | (7.00)                   | (0.01)                  | (8.54)       |
|                                 |     | 37.41                                       | 0.02                | 21.5               | 0.00               | 0.04              | 0.00               | 0.01               | 27.49                    | 0.02                    | 37.41        |
|                                 |     | 70.86                                       | 0.02                | 38.3               | 0.00               | 0.04              | 0.00               | 0.01               | 76.71                    | 0.04                    | 185.94       |
|                                 | [3] | [3]                                         | [3]                 | [3]                | [3]                | [3]               | [3]                | [18]               | [9]                      | [48]                    |              |
| Fluorescence (RFU)              |     | 0                                           | 0                   | 0                  | 0                  | 0                 | 0                  | 0                  | 0                        | 0                       | 0            |
|                                 |     | <b>8473</b>                                 | <b>1271</b>         | <b>776</b>         | <b>359</b>         | <b>0</b> (0)      | <b>0</b> (0)       | <b>0</b> (0)       | <b>1205</b>              | <b>21</b> (63)          | 1136         |
|                                 |     | (8598)                                      | (2202)              | (1345)             | (622)              | 0                 | 0                  | 0                  | (1931)                   | 190                     | (2961)       |
|                                 |     | 17189                                       | 3814                | 2329               | 1077               | 0                 | 0                  | 0                  | 5847                     | 190                     | 17189        |
|                                 |     | 25420                                       | 3814                | 2329               | 1077               | [3]               | [3]                | [3]                | 21691                    | [9]                     | 54521        |
|                                 | [3] | [3]                                         | [3]                 | [3]                |                    |                   |                    | [18]               |                          | [48]                    |              |
| Assistant contamination         |     |                                             |                     |                    |                    |                   |                    |                    |                          |                         |              |
|                                 |     | <b>Left body</b>                            | <b>Right Body</b>   | <b>Left arm</b>    | <b>Right arm</b>   | <b>Left leg</b>   | <b>Right leg</b>   | <b>Head</b>        | <b>Visor<sup>#</sup></b> | <b>Mask<sup>§</sup></b> | <b>Total</b> |
| Surface area (mm <sup>2</sup> ) |     | 0.00                                        | 0.00                | 0.00               | 0.00               | 0.00              | 0.00               | 0.00               | 0.00                     | 0.00                    | 0.00         |
|                                 |     | <b>0.00</b>                                 | <b>0.00</b>         | <b>0.10</b>        | <b>2.17</b>        | <b>0.00</b>       | <b>0.42</b>        | <b>0.00</b>        | <b>0.00</b>              | <b>0.00</b>             | 0.14         |
|                                 |     | (0.00)                                      | (0.00)              | (0.17)             | (2.55)             | (0.00)            | (0.07)             | (0.00)             | (0.00)                   | (0.00)                  | (0.75)       |
|                                 |     | 0.00                                        | 0.00                | 0.29               | 4.97               | 0.00              | 0.13               | 0.00               | 0.00                     | 0.00                    | 4.98         |
|                                 |     | 0.00                                        | 0.00                | 0.29               | 6.51               | 0.00              | 0.13               | 0.00               | 0.00                     | 0.00                    | 6.93         |
|                                 | [3] | [3]                                         | [3]                 | [3]                | [3]                | [3]               | [3]                | [3]                | [18]                     | [9]                     | [48]         |
| Fluorescence (RFU)              |     | 0                                           | 0                   | 0                  | 0                  | 0                 | 0                  | 0                  | 0                        | 0                       | 0            |
|                                 |     | <b>0</b> (0)                                | <b>0</b> (0)        | <b>0</b> (0)       | <b>645</b>         | <b>0</b> (0)      | <b>0</b> (0)       | <b>0</b> (0)       | <b>27</b> (113)          | <b>0</b> (0)            | 50 (255)     |
|                                 |     | 0                                           | 0                   | 0                  | (921)              | 0                 | 0                  | 0                  | 481                      | 0                       | 1700         |
|                                 |     | 0                                           | 0                   | 0                  | 1700               | 0                 | 0                  | 0                  | 481                      | 0                       | 2417         |
|                                 |     | [3]                                         | [3]                 | [3]                | 1936               | [3]               | [3]                | [3]                | [18]                     | [9]                     | [48]         |
|                                 |     |                                             |                     | [3]                |                    |                   |                    |                    |                          |                         |              |
| Mannequin contamination         |     |                                             |                     |                    |                    |                   |                    |                    |                          |                         |              |
|                                 |     | <b>Upper left</b>                           |                     | <b>Upper right</b> |                    | <b>Lower left</b> |                    | <b>Lower right</b> |                          | <b>Total</b>            |              |
| Surface area (mm <sup>2</sup> ) |     |                                             | 12.34               |                    | 1.58               |                   | 0.03               |                    | 0.00                     | 0.00                    |              |
|                                 |     |                                             | <b>13.59</b> (1.24) |                    | <b>4.46</b> (2.97) |                   | <b>2.79</b> (4.58) |                    | <b>0.01</b> (0.01)       | 5.21                    |              |
|                                 |     |                                             | 14.82               |                    | 7.51               |                   | 8.03               |                    | 0.02                     | (5.82)                  |              |
|                                 |     |                                             | 40.78               |                    | 13.37              |                   | 8.36               |                    | 0.03                     | 14.82                   |              |
|                                 |     |                                             | [3]                 |                    | [3]                |                   | [3]                |                    | [3]                      | 62.55                   |              |
|                                 |     |                                             |                     |                    |                    |                   |                    |                    |                          | [12]                    |              |
| Fluorescence (RFU)              |     |                                             | 0                   |                    | 666                |                   | 0                  |                    | 0                        | 0                       |              |
|                                 |     |                                             | <b>4303</b> (5911)  |                    | <b>1931</b> (1326) |                   | <b>124</b> (175)   |                    | <b>0</b> (0)             | 1723                    |              |
|                                 |     |                                             | 11044               |                    | 3312               |                   | 248                |                    | 0                        | (3280)                  |              |
|                                 |     |                                             | 12910               |                    | 5795               |                   | 248                |                    | 0                        | 11044                   |              |
|                                 |     |                                             | [3]                 |                    | [3]                |                   | [2]                |                    | [3]                      | 18953                   |              |
|                                 |     |                                             |                     |                    |                    |                   |                    |                    |                          | [11]                    |              |

**Supplementary Table 1.** Positive control (high-speed air turbine crown preparation with assistant held dental suction). Dental aerosol and splatter as measured by contaminated surface area using image analysis or by spectrofluorometric analysis. The data from an average of three repetitions for all samples at each location are included together.

# All visor samples combined

§ All mask samples combined

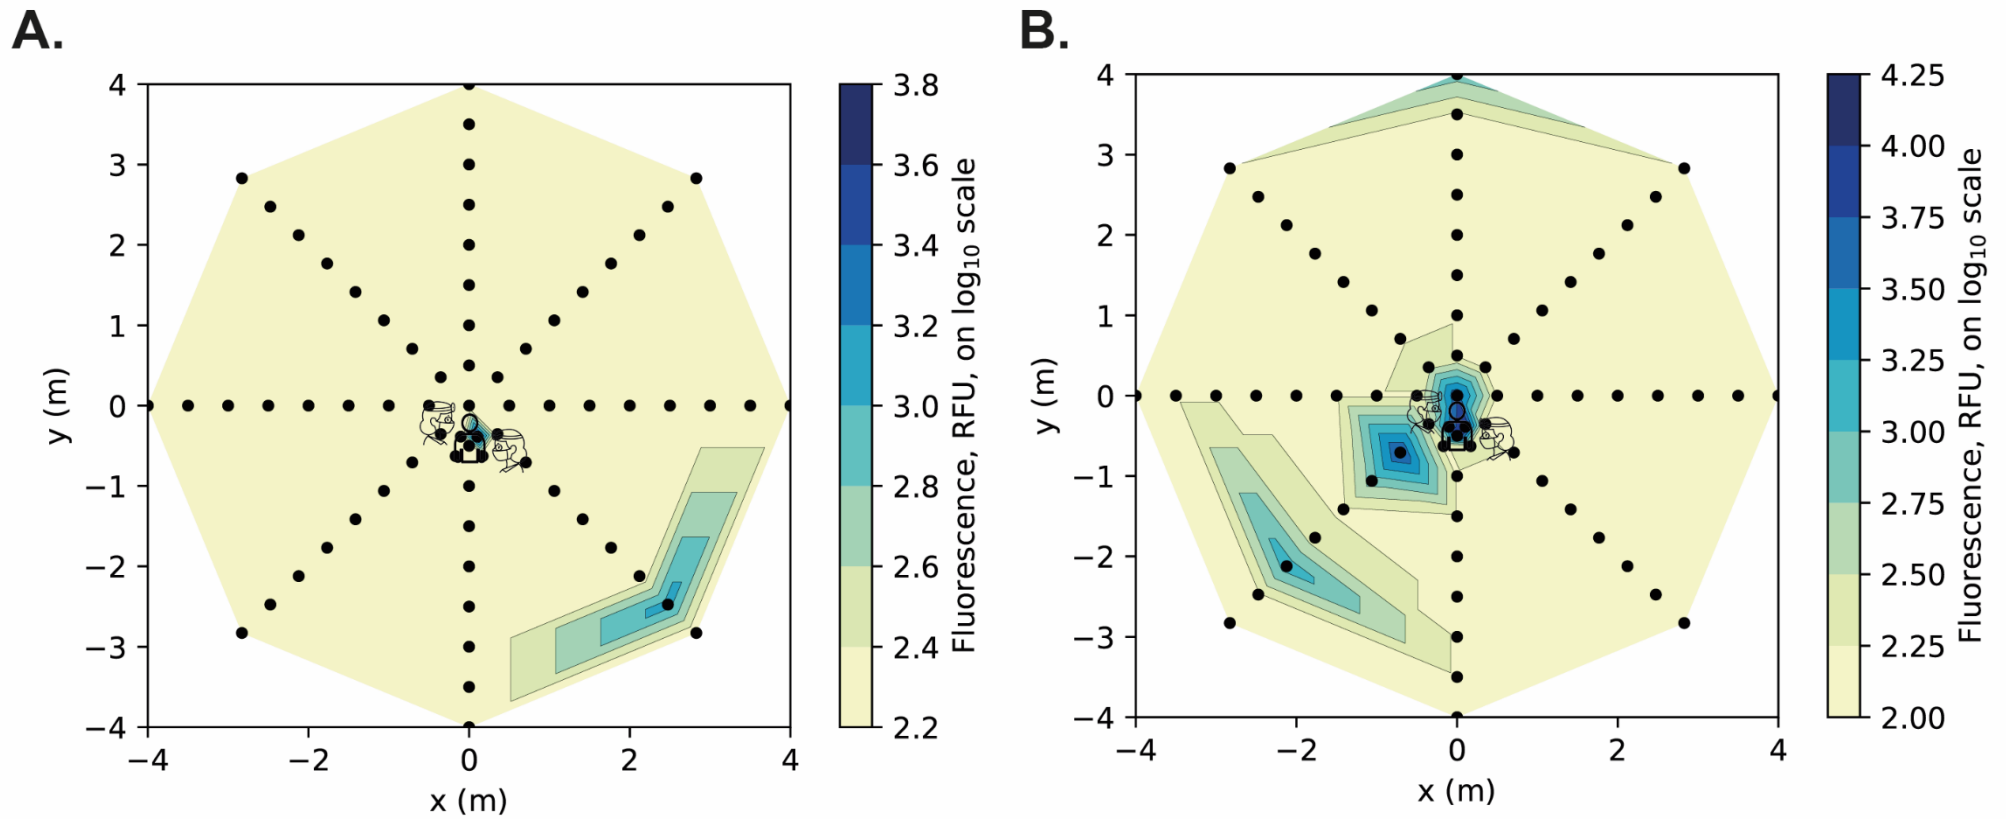

**Supplementary Figure 1.** Heatmaps presenting spectrofluorometric analysis data. A, Orthodontic debonding procedure. B, positive control (anterior crown preparation). For each coordinate, the maximum value recorded from three repetitions of each clinical procedure was used. Logarithmic transformation was performed on the data (Log<sub>10</sub>). Note the scale includes the full dimensions of the experimental rig. RFU: relative fluorescence units.
